# Supplementary material
Source: HighWire-hosted journal article supplement (https://ard.bmj.com/content/78/11/1517)
Supplement: inline-supplementary-material-1 [file inline-supplementary-material-1.pdf]

Supplementary files: Incidence and time trends in joint surgery among patients with psoriatic arthritis: A register-based time series study from Denmark

**Table S1. Joint-related surgery including total joint replacements and soft tissue procedures of the upper and lower limbs and related NOMESCO-10 code.**

| Surgical category and specific procedure:                                                        | ICD-10 code |
|--------------------------------------------------------------------------------------------------|-------------|
| <b>Ankle and foot</b>                                                                            |             |
| <b>Arthroplasty:</b> Primary prosthetic replacement of joint of ankle and foot                   | KNHB        |
| <b>Soft tissue:</b> Operations on capsules and ligaments of joints of ankle and foot             | KNHE        |
| <b>Synovium:</b> Operations on synovia and joint surfaces of ankle and foot                      | KNHF        |
| <b>Arthrodesis:</b> Excision, reconstruction and fusion of joints of ankle and foot              | KNHG        |
| <b>Soft tissue:</b> Miscellaneous operations on joints of ankle and foot                         | KNHH        |
| <b>Soft tissue:</b> Operations on muscles and tendons of ankle and foot                          | KNHL        |
| <b>Soft tissue:</b> Operations on fascia, ganglia, synovial sheaths and bursae of ankle and foot | KNHM        |
| <b>Knee</b>                                                                                      |             |
| <b>Arthroplasty:</b> Primary prosthetic replacement of knee joint                                | KNGB        |
| <b>Soft tissue:</b> Operations on capsules and ligaments of knee joint                           | KNGE        |
| <b>Synovium:</b> Operations on synovia and joint surfaces of knee                                | KNGF        |
| <b>Arthrodesis:</b> Excision, reconstruction and fusion of knee joint                            | KNGG        |
| <b>Soft tissue:</b> Operations on fascia, ganglia, and bursae of knee and lower leg              | KNGM        |
| <b>Procedure: Hip</b>                                                                            |             |
| <b>Arthroplasty:</b> Primary prosthetic replacement of hip joint                                 | KNFB        |
| <b>Soft tissue:</b> Operations on capsules and ligaments of hip joint                            | KNFE        |
| <b>Synovium:</b> Operations on synovia and surfaces of hip joint                                 | KNFF        |
| <b>Arthrodesis:</b> Excision, reconstruction and fusion of hip joint                             | KNFG        |
| <b>Soft tissue:</b> Operations on fascia, ganglia and bursae of hip and thigh                    | KNFM        |
| <b>Hand and wrist</b>                                                                            |             |
| <b>Arthroplasty:</b> Primary prosthetic replacement of joint of wrist and hand                   | KNDB        |
| <b>Soft tissue:</b> Operations on capsules and ligaments of joints of wrist and hand             | KNDE        |
| <b>Synovium:</b> Operations on synovia and joint surfaces of wrist and hand                      | KNDF        |
| <b>Arthrodesis:</b> Excision, reconstruction and fusion of joint of wrist and hand               | KNDG        |
| <b>Soft tissue:</b> Operations on muscles and tendons of wrist and hand                          | KNDL        |
| <b>Soft tissue:</b> Operations on fascia, ganglia, synovial sheaths and bursae of wrist and hand | KNDM        |
| <b>Soft tissue:</b> Miscellaneous operations on wrist and hand                                   | KNDT        |
| <b>Elbow</b>                                                                                     |             |
| <b>Arthroplasty:</b> Primary prosthetic replacement of elbow joint                               | KNCB        |
| <b>Soft tissue:</b> Operations on capsules and ligaments of elbow joint                          | KNCE        |
| <b>Synovium:</b> Operations on synovia and surfaces of elbow joint                               | KNCF        |
| <b>Arthrodesis:</b> Excision, reconstruction and fusion of elbow joint                           | KNCG        |
| <b>Soft tissue:</b> Operations on muscles and tendons of elbow and forearm                       | KNCL        |

|                                                                                                                                                                                                                                       |      |
|---------------------------------------------------------------------------------------------------------------------------------------------------------------------------------------------------------------------------------------|------|
| <b>Soft tissue:</b> Miscellaneous operations on elbow joint                                                                                                                                                                           | KNCH |
| <b>Soft tissue:</b> Operations on fascia, ganglia, synovial sheaths and bursae of elbow and forearm                                                                                                                                   | KNCM |
| <b>Shoulder</b>                                                                                                                                                                                                                       |      |
| <b>Arthroplasty:</b> Primary prosthetic replacement of joints of shoulder                                                                                                                                                             | KNBB |
| <b>Soft tissue:</b> Operations on capsules and ligaments of joints of shoulder                                                                                                                                                        | KNBE |
| <b>Synovium:</b> Operations on synovia and surfaces of joint of shoulder                                                                                                                                                              | KNBF |
| <b>Arthrodesis:</b> Excision, reconstruction and fusion of joints of shoulder                                                                                                                                                         | KNBG |
| <b>Soft tissue:</b> Operations on muscles and tendons of shoulder and upper arm                                                                                                                                                       | KNBL |
| <b>Soft tissue:</b> Miscellaneous operations on shoulder or upper arm                                                                                                                                                                 | KNBH |
| <b>Soft tissue:</b> Operations on fascia, ganglia and bursae of shoulder and upper arm                                                                                                                                                | KNBM |
| <b>Surgeries classified as arthroplasty and arthrodesis were categorised as joint sacrificing surgery whereas non-joint sacrificing surgery was defined as soft tissue, synovial surgery or joint surfaces, mainly synovectomies.</b> |      |

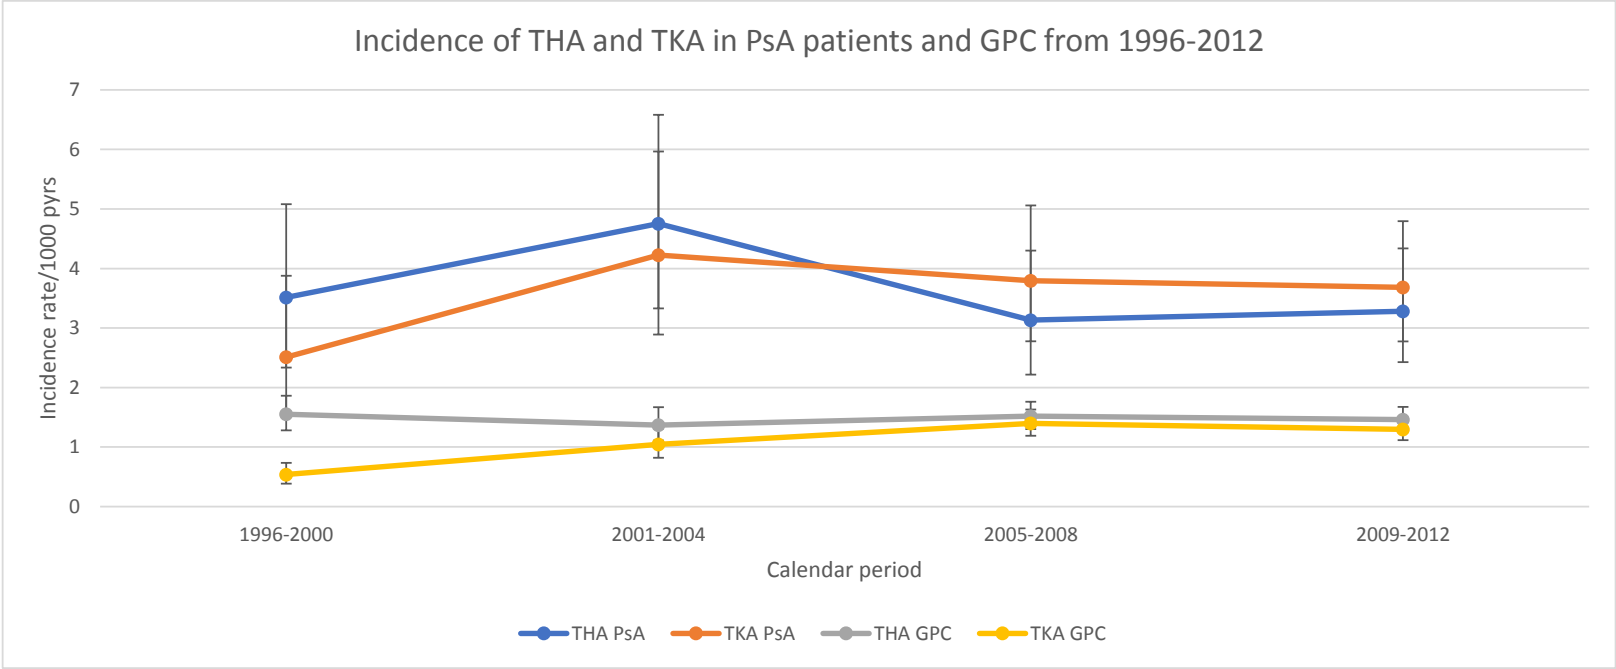

Figure S1: Five-year incidence rates (per 1000 pyrs) of THA and TKA among newly diagnosed PsA patients and GPC from 1996-2012.

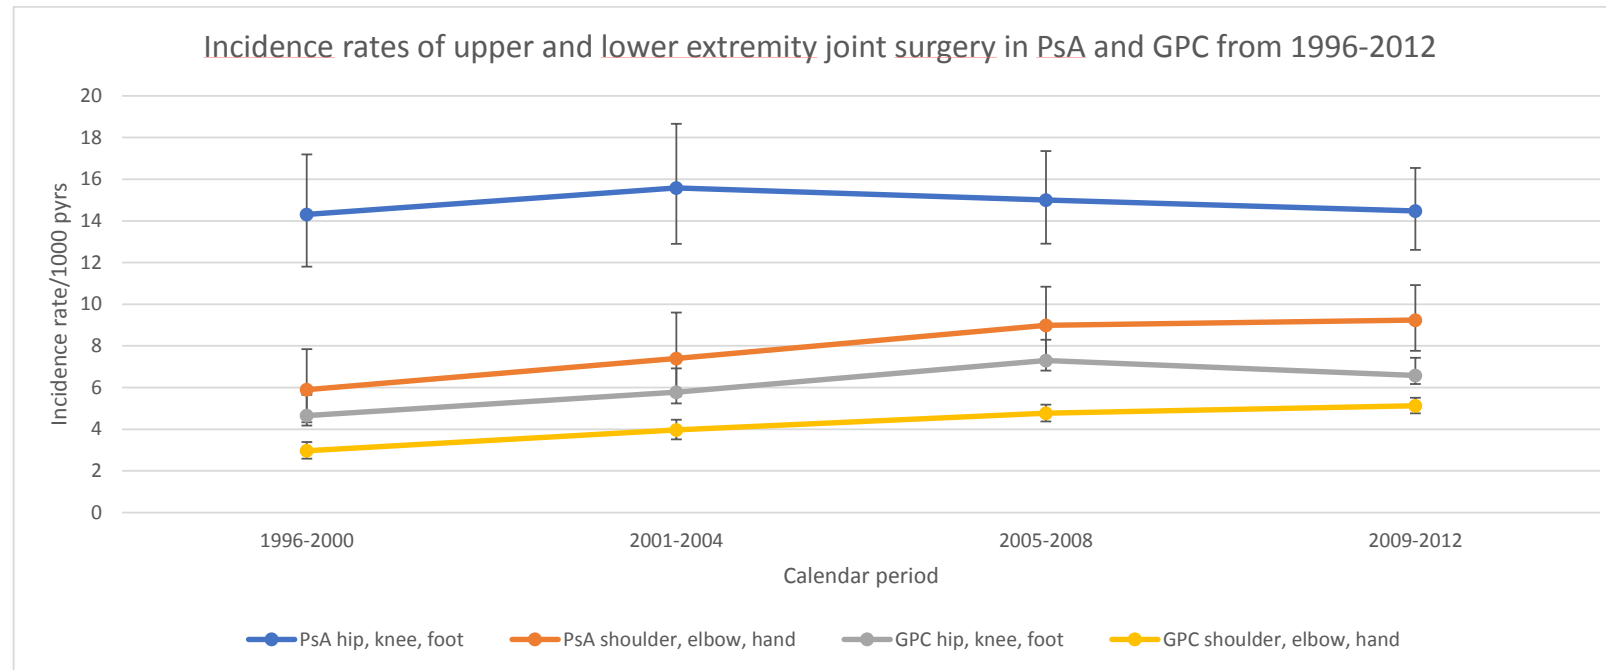

Figure S2: Five-year incidence rates (per 1000 pyrs) of surgery of the upper- or lower extremity among newly diagnosed PsA patients and GPC from 1996-2012.

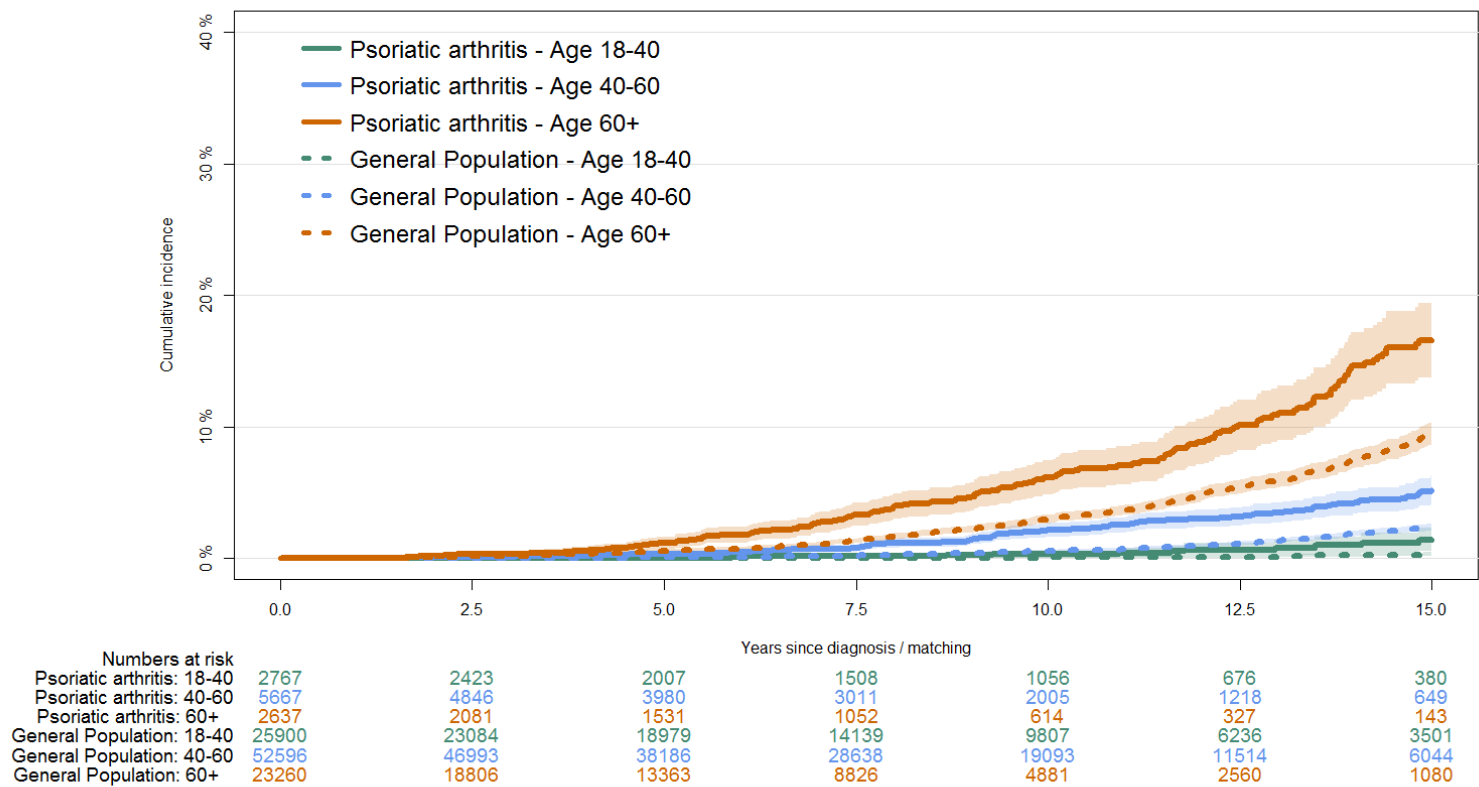

Figure S3: The cumulative incidence of THA stratified according to the time of PsA diagnosis compared with GPC matched at the same time of diagnosis

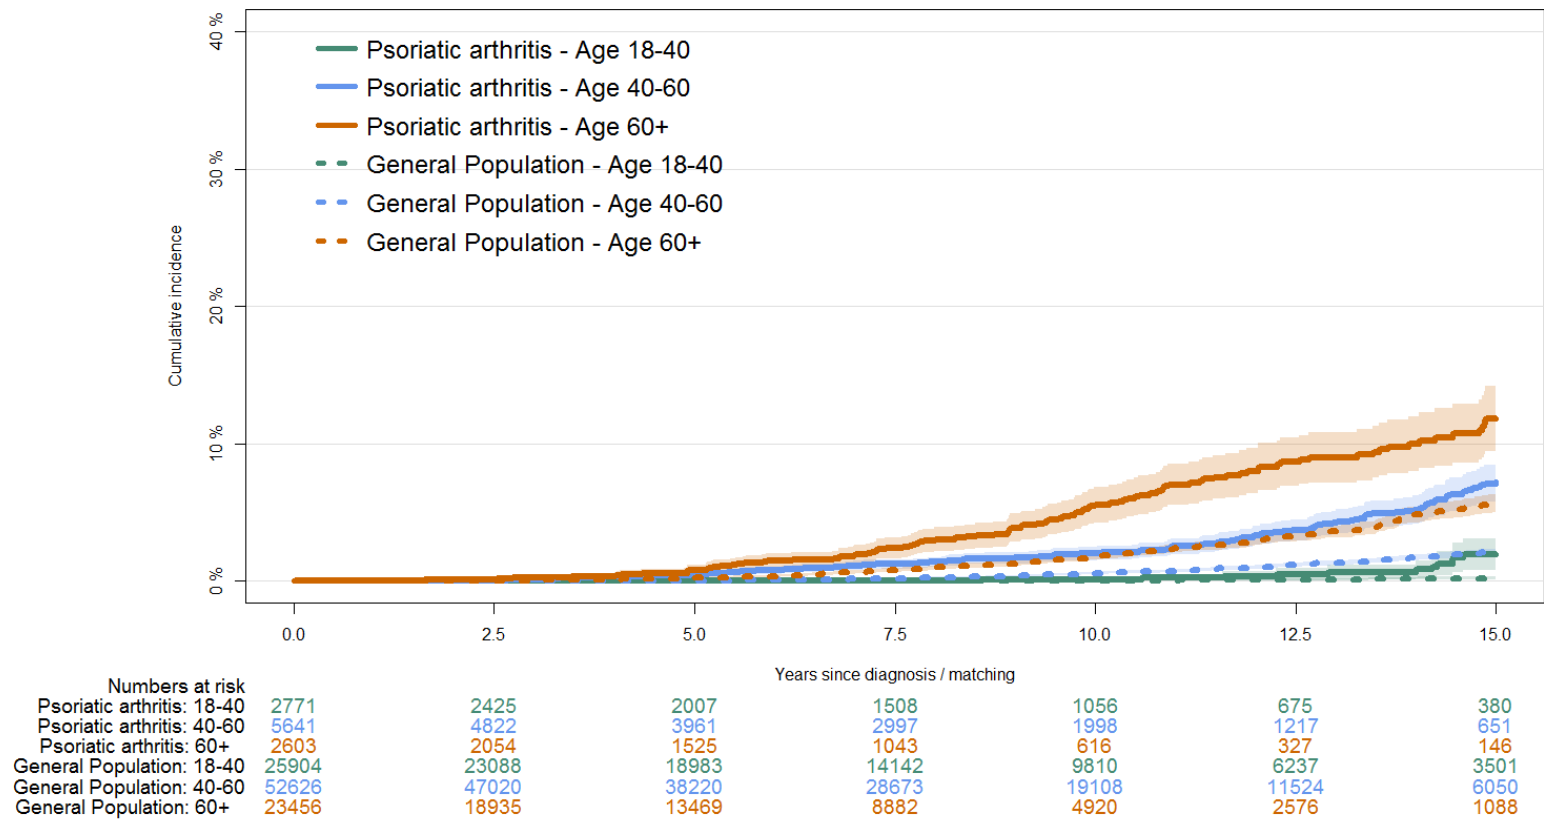

Figure S4: The cumulative incidence of TKA stratified according to the time of PsA diagnosis compared with GPC matched at the same time of diagnosis.
